# Supplementary material
Source: Springer Nature journal article supplement (https://www.springermedizin.de/resource/supplementary/12885_2013_3921_MOESM8_ESM.pdf/9464778)

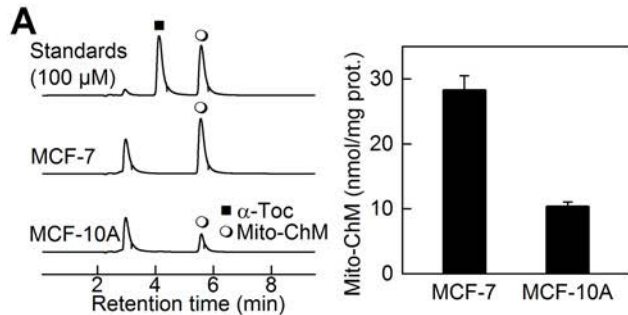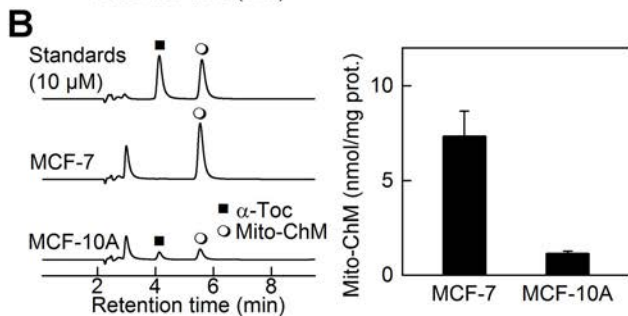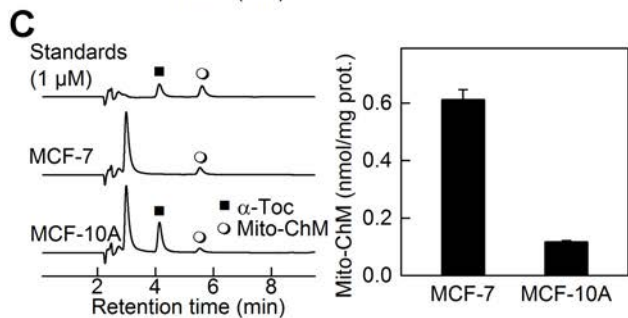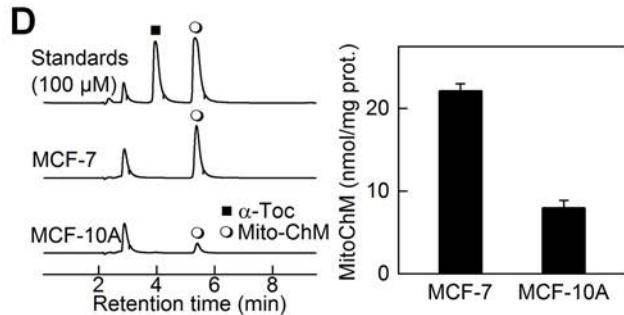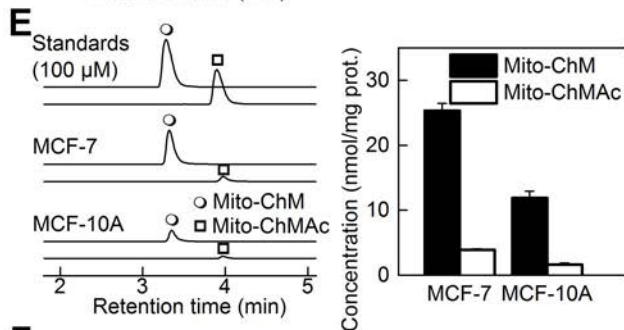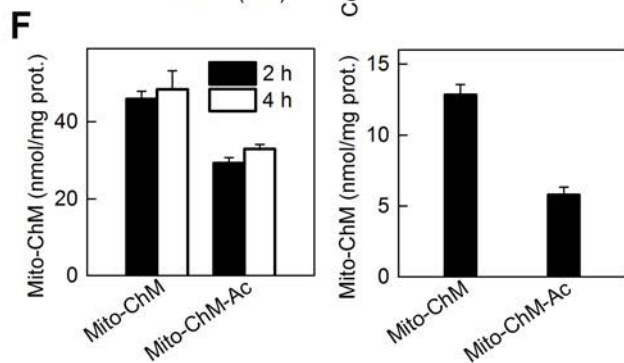

Supplement: MOESM8 [file 9464778]
